# Supplementary material for: Synthesis, structures, and properties of two magnesium silicate fluorides Mg5(SiO4)2F2and Mg3SiO4F2
Source: Royal Society of Chemistry journal article supplement (doi:10.1039/c5nj01911g), 2015-01-01
Supplement: c5nj01911g1.pdf [file c5nj01911g1.pdf]

## Supporting Information

### Synthesis, structures, properties of two magnesium silicate fluorides

#### $\text{Mg}_5(\text{SiO}_4)_2\text{F}_2$ and $\text{Mg}_3\text{SiO}_4\text{F}_2$

Ni Zhen,<sup>a,b</sup> Kui Wu,<sup>b</sup> Qiang Li,<sup>a,\*</sup> Shilie Pan,<sup>b,\*</sup> Wenhui Gao,<sup>b</sup> Zhihua Yang<sup>b</sup>

*<sup>a</sup>School of Physics Science and Technology, Xinjiang University, Urumqi, Xinjiang  
830046, China.*

*<sup>b</sup>Key Laboratory of Functional Materials and Devices for Special Environments,  
Xinjiang Technical Institute of Physics & Chemistry, Chinese Academy of Sciences;  
Xinjiang Key Laboratory of Electronic Information Materials and Devices, 40-1  
South Beijing Road, Urumqi 830011, China.*

To whom correspondence should be addressed.

E-mail: [slpan@ms.xjb.ac.cn](mailto:slpan@ms.xjb.ac.cn) (Shilie Pan)

Figure S1. EDX spectra of  $\text{Mg}_5(\text{SiO}_4)_2\text{F}_2$  (a) and  $\text{Mg}_3\text{SiO}_4\text{F}_2$  (b).

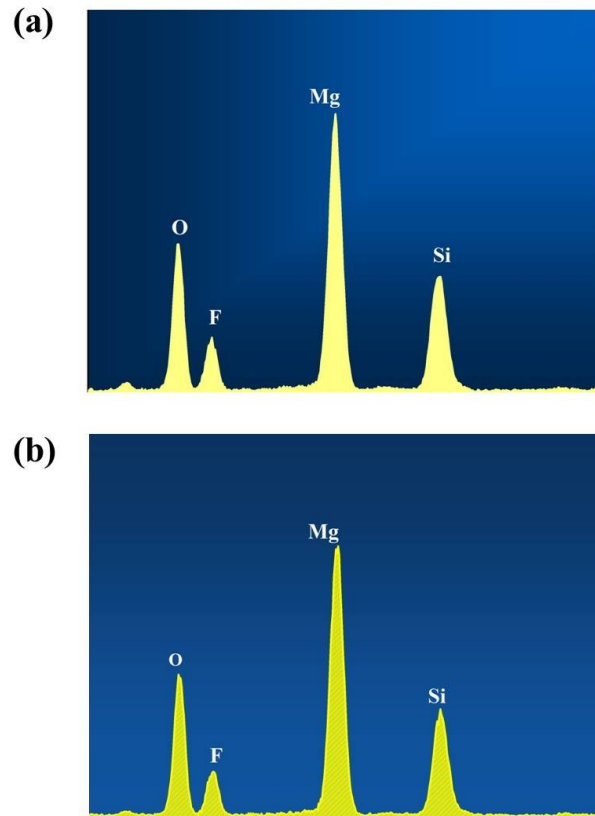

Table S1. Average EDX data for  $\text{Mg}_5(\text{SiO}_4)_2\text{F}_2$  (a) and  $\text{Mg}_3\text{SiO}_4\text{F}_2$  (b).

(a) Compound  $\text{Mg}_5(\text{SiO}_4)_2\text{F}_2$ :

| Element | Weight % | Atomic % | Formula |
|---------|----------|----------|---------|
| Mg      | 35.52    | 29.67    | 5.07    |
| Si      | 17.08    | 12.35    | 2.11    |
| O       | 36.53    | 46.36    | 7.92    |
| F       | 10.87    | 11.62    | 1.99    |

(b) Compound  $\text{Mg}_3\text{SiO}_4\text{F}_2$ :

| Element | Weight % | Atomic % | Formula |
|---------|----------|----------|---------|
| Mg      | 34.86    | 29.05    | 2.96    |
| Si      | 14.09    | 10.16    | 1.04    |
| O       | 31.93    | 40.41    | 4.12    |
| F       | 19.12    | 20.38    | 2.08    |

Figure S2. Experimental and calculated XRD patterns of  $\text{Mg}_3\text{SiO}_4\text{F}_2$ .

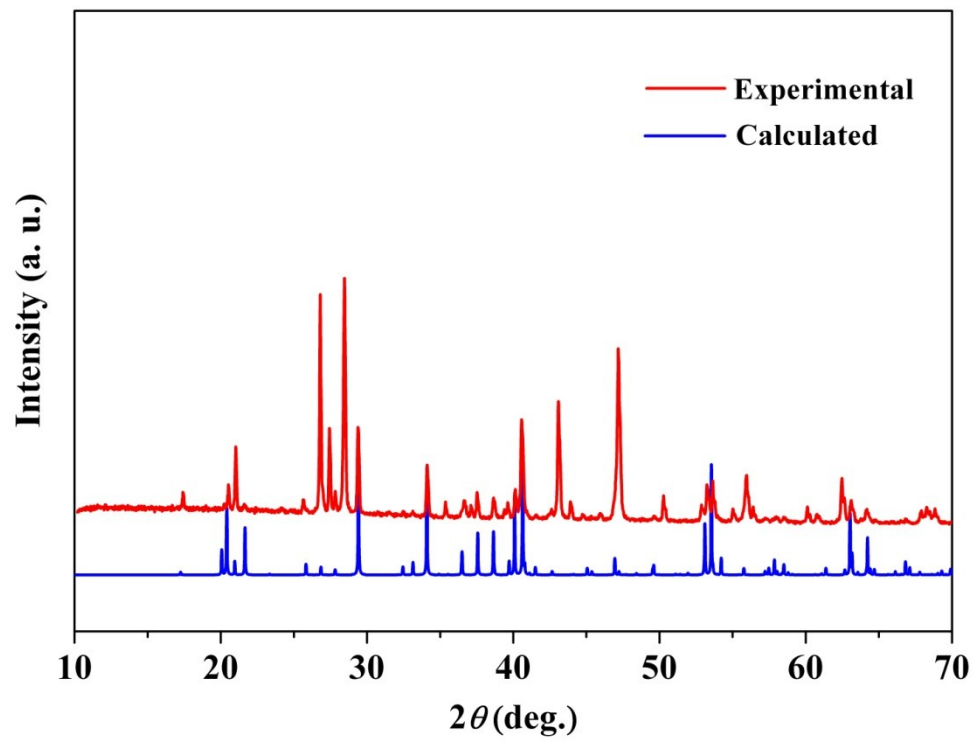

Table S2. (a) Atomic coordinates ( $\times 10^4$ ) and equivalent isotropic displacement parameters ( $\text{\AA}^2 \times 10^3$ ) for  $\text{Mg}_5(\text{SiO}_4)_2\text{F}_2$ .  $U_{\text{eq}}$  is defined as one-third of the trace of the orthogonalized  $U_{ij}$  tensor.

| Atom  | X       | Y        | Z       | $U_{\text{eq}}$ | BVS   |
|-------|---------|----------|---------|-----------------|-------|
| Mg(1) | 5802(3) | 4930(4)  | 3868(2) | 5(1)            | 2.058 |
| Mg(2) | 8015(3) | 67(4)    | 6731(2) | 4(1)            | 1.889 |
| Mg(3) | 0       | 5000     | 5000    | 5(1)            | 2.073 |
| Si(1) | 2038(3) | 761(5)   | 6442(2) | 23(1)           | 4.197 |
| O(1)  | 7921(5) | 7692(10) | 5041(5) | 14(1)           | 1.911 |
| O(2)  | 3715(6) | 2763(9)  | 2560(4) | 8(1)            | 2.207 |
| O(3)  | 247(6)  | 2240(10) | 6663(4) | 11(1)           | 2.019 |
| O(4)  | 2070(5) | -2599(9) | 6455(4) | 7(1)            | 2.103 |
| F(1)  | 6024(4) | 2715(7)  | 5585(3) | 8(1)            | 0.941 |

Table S2. (b) Atomic coordinates ( $\times 10^4$ ) and equivalent isotropic displacement parameters ( $\text{\AA}^2 \times 10^3$ ) for  $\text{Mg}_3\text{SiO}_4\text{F}_2$ .  $U_{\text{eq}}$  is defined as one-third of the trace of the orthogonalized  $U_{ij}$  tensor.

| Atom  | X       | Y       | Z        | $U_{\text{eq}}$ | BVS   |
|-------|---------|---------|----------|-----------------|-------|
| Mg(1) | 5937(2) | 2500    | -68(4)   | 3(1)            | 1.864 |
| Mg(2) | 8667(1) | 4297(2) | -103(3)  | 4(1)            | 2.058 |
| Si(1) | 7805(2) | 2500    | 4193(5)  | 19(1)           | 4.129 |
| O(1)  | 9264(5) | 2500    | 2732(10) | 9(1)            | 1.952 |
| O(2)  | 7094(3) | 3954(4) | 2688(7)  | 9(1)            | 2.131 |
| O(3)  | 7794(4) | 2500    | 7570(10) | 6(1)            | 2.075 |
| F(1)  | 5327(2) | 4165(3) | -2722(6) | 7(1)            | 0.961 |

Table S3. (a) Selected bond distances (Å) and angles (deg) for Mg<sub>5</sub>(SiO<sub>4</sub>)<sub>2</sub>F<sub>2</sub>.

|                     |            |                       |            |
|---------------------|------------|-----------------------|------------|
| Mg(1)-F(1)          | 1.997(4)   | F(1)-Mg(1)-O(1)       | 89.49(17)  |
| Mg(1)-O(2)          | 1.999(4)   | O(2)-Mg(1)-O(1)       | 171.9(2)   |
| Mg(1)-F(1)#7        | 2.016(4)   | F(1)#7-Mg(1)-O(1)     | 89.86(16)  |
| Mg(1)-O(4)#4        | 2.096(4)   | O(4)#4-Mg(1)-O(1)     | 84.22(17)  |
| Mg(1)-O(2)#8        | 2.096(4)   | O(2)#8-Mg(1)-O(1)     | 74.2(2)    |
| Mg(1)-O(1)          | 2.120(4)   | F(1)#12-Mg(2)-O(1)    | 91.96(17)  |
| Mg(2)-F(1)#12       | 2.021(4)   | F(1)#12-Mg(2)-O(3)#12 | 100.21(18) |
| Mg(2)-O(1)          | 2.036(4)   | O(1)-Mg(2)-O(3)#12    | 91.56(19)  |
| Mg(2)-O(3)#12       | 2.048(5)   | F(1)#12-Mg(2)-O(2)#7  | 97.22(17)  |
| Mg(2)-O(2)#7        | 2.174(4)   | O(1)-Mg(2)-O(2)#7     | 96.02(18)  |
| Mg(2)-O(4)#13       | 2.175(4)   | O(3)#12-Mg(2)-O(2)#7  | 160.7(2)   |
| Mg(2)-O(3)#14       | 2.180(5)   | F(1)#12-Mg(2)-O(4)#13 | 87.46(15)  |
| Mg(3)-O(1)          | 2.057(4)   | O(1)-Mg(2)-O(4)#13    | 175.38(18) |
| Mg(3)-O(1)#2        | 2.057(4)   | O(3)#12-Mg(2)-O(4)#13 | 93.05(18)  |
| Mg(3)-O(3)          | 2.089(4)   | O(2)#7-Mg(2)-O(4)#13  | 79.51(16)  |
| Mg(3)-O(3)#2        | 2.089(4)   | F(1)#12-Mg(2)-O(3)#14 | 164.51(17) |
| Mg(3)-O(4)#4        | 2.113(4)   | O(1)-Mg(2)-O(3)#14    | 98.85(19)  |
| Mg(3)-O(4)#12       | 2.113(4)   | O(3)#12-Mg(2)-O(3)#14 | 90.60(12)  |
| Si(1)-O(2)#1        | 1.577(5)   | O(2)#7-Mg(2)-O(3)#14  | 70.76(19)  |
| Si(1)-O(4)          | 1.565(5)   | O(4)#13-Mg(2)-O(3)#14 | 80.86(16)  |
| Si(1)-O(3)          | 1.617(5)   | O(1)-Mg(3)-O(1)#2     | 180.0(3)   |
| Si(1)-O(1)#2        | 1.693(5)   | O(1)-Mg(3)-O(3)       | 103.0(2)   |
| O(2)#1-Si(1)-O(1)#2 | 102.0(2)   | O(1)#2-Mg(3)-O(3)     | 77.0(2)    |
| O(3)-Si(1)-O(1)#2   | 102.5(2)   | O(1)-Mg(3)-O(3)#2     | 77.0(2)    |
| F(1)-Mg(1)-O(2)     | 98.19(17)  | O(1)#2-Mg(3)-O(3)#2   | 103.0(2)   |
| F(1)-Mg(1)-F(1)#7   | 84.11(16)  | O(3)-Mg(3)-O(3)#2     | 180.000(1) |
| F(1)-Mg(1)-O(4)#4   | 91.78(16)  | O(1)-Mg(3)-O(4)#4     | 85.35(16)  |
| O(2)-Mg(1)-O(4)#4   | 97.98(18)  | O(1)#2-Mg(3)-O(4)#4   | 94.65(16)  |
| F(1)#7-Mg(1)-O(4)#4 | 172.84(17) | O(3)-Mg(3)-O(4)#4     | 95.53(16)  |
| F(1)-Mg(1)-O(2)#8   | 163.28(19) | O(2)-Mg(1)-F(1)#7     | 88.43(17)  |
| O(2)-Mg(1)-O(2)#8   | 98.29(13)  | O(3)#2-Mg(3)-O(4)#4   | 84.47(16)  |
| F(1)#7-Mg(1)-O(2)#8 | 99.16(16)  | O(1)-Mg(3)-O(4)#12    | 94.65(16)  |
| O(4)#4-Mg(1)-O(2)#8 | 83.15(17)  | O(1)#2-Mg(3)-O(4)#12  | 85.35(16)  |
| O(4)-Si(1)-O(2)#1   | 115.0(2)   | O(3)-Mg(3)-O(4)#12    | 84.47(16)  |
| O(4)-Si(1)-O(3)     | 115.9(2)   | O(3)#2-Mg(3)-O(4)#12  | 95.53(16)  |
| O(2)#1-Si(1)-O(3)   | 104.3(2)   | O(4)#4-Mg(3)-O(4)#12  | 180        |
| O(4)-Si(1)-O(1)#2   | 115.3(2)   |                       |            |

Note. Symmetry transformations used to generate equivalent atoms:

#1  $x+1, -y+1/2, z+1/2$       #2  $-x+2, -y+1, -z+1$

#3  $-x+2, y-1/2, -z+3/2$       #4  $-x+2, -y, -z+1$

#5  $x, y-1, z$       #6  $-x+2, y-3/2, -z+3/2$       #7  $-x+1, -y+1, -z+1$

#8  $-x+1, y+1/2, -z+1/2$       #9  $x-1, -y+1/2, z-1/2$

#10  $x, -y+3/2, z-1/2$       #11  $-x+1, y-1/2, -z+1/2$

#12  $x, y+1, z$       #13  $-x+2, y+3/2, -z+3/2$

#14  $-x+2, y+1/2, -z+3/2$       #15  $x, -y+3/2, z+1/2$

Table S3. (b) Selected bond distances (Å) and angles (deg) for Mg<sub>3</sub>SiO<sub>4</sub>F<sub>2</sub>.

|                     |            |                     |            |
|---------------------|------------|---------------------|------------|
| Mg(1)-F(1)#1        | 2.002(3)   | F(1)#1-Mg(1)-O(3)#3 | 87.90(13)  |
| Mg(1)-F(1)          | 2.002(3)   | F(1)-Mg(1)-O(3)#3   | 87.90(13)  |
| Mg(1)-O(1)#2        | 2.032(5)   | O(1)#2-Mg(1)-O(3)#3 | 177.6(2)   |
| Mg(1)-O(2)          | 2.157(4)   | O(2)-Mg(1)-O(3)#3   | 79.58(16)  |
| Mg(1)-O(2)#1        | 2.157(4)   | O(2)#1-Mg(1)-O(3)#3 | 79.58(16)  |
| Mg(1)-O(3)#3        | 2.200(5)   | F(1)#8-Mg(2)-O(2)#9 | 96.78(14)  |
| Mg(2)-F(1)#8        | 1.985(3)   | F(1)#8-Mg(2)-F(1)#6 | 83.02(13)  |
| Mg(2)-O(2)#9        | 1.995(4)   | O(2)#9-Mg(2)-F(1)#6 | 88.72(14)  |
| Mg(2)-F(1)#6        | 2.020(3)   | F(1)#8-Mg(2)-O(2)   | 165.95(15) |
| Mg(2)-O(2)          | 2.093(4)   | O(2)#9-Mg(2)-O(2)   | 97.21(11)  |
| Mg(2)-O(3)#3        | 2.101(4)   | F(1)#6-Mg(2)-O(2)   | 98.57(14)  |
| Mg(2)-O(1)          | 2.134(4)   | F(1)#8-Mg(2)-O(3)#3 | 93.50(16)  |
| Si(1)-O(3)          | 1.570(5)   | O(2)#9-Mg(2)-O(3)#3 | 97.73(15)  |
| Si(1)-O(2)#1        | 1.619(4)   | F(1)#6-Mg(2)-O(3)#3 | 173.01(14) |
| Si(1)-O(2)          | 1.619(4)   | O(2)-Mg(2)-O(3)#3   | 83.34(17)  |
| Si(1)-O(1)          | 1.645(6)   | F(1)#8-Mg(2)-O(1)   | 91.48(16)  |
| F(1)#1-Mg(1)-F(1)   | 92.57(18)  | O(2)#9-Mg(2)-O(1)   | 171.42(19) |
| F(1)#1-Mg(1)-O(1)#2 | 93.73(14)  | F(1)#6-Mg(2)-O(1)   | 89.96(13)  |
| F(1)-Mg(1)-O(1)#2   | 93.73(14)  | O(2)-Mg(2)-O(1)     | 74.60(18)  |
| F(1)#1-Mg(1)-O(2)   | 164.17(15) | O(3)#3-Mg(2)-O(1)   | 84.05(15)  |
| F(1)-Mg(1)-O(2)     | 96.58(13)  | O(3)-Si(1)-O(2)#1   | 115.40(17) |
| O(1)#2-Mg(1)-O(2)   | 98.52(17)  | O(3)-Si(1)-O(2)     | 115.40(17) |
| F(1)#1-Mg(1)-O(2)#1 | 96.58(13)  | O(2)#1-Si(1)-O(2)   | 102.7(3)   |
| F(1)-Mg(1)-O(2)#1   | 164.17(15) | O(3)-Si(1)-O(1)     | 114.8(3)   |
| O(1)#2-Mg(1)-O(2)#1 | 98.52(17)  | O(2)#1-Si(1)-O(1)   | 103.43(18) |
| O(2)-Mg(1)-O(2)#1   | 71.8(2)    | O(2)-Si(1)-O(1)     | 103.43(18) |

Note. Symmetry transformations used to generate equivalent atoms:

#1  $x, -y+1/2, z$     #2  $x-1/2, y, -z+1/2$     #3  $x, y, z-1$

#4  $x-1/2, -y+1/2, -z-1/2$     #5  $x-1/2, y, -z-1/2$

#6  $-x+3/2, -y+1, z+1/2$     #7  $-x+3/2, y-1/2, z+1/2$

#8  $x+1/2, y, -z-1/2$     #9  $-x+3/2, -y+1, z-1/2$

#10  $-x+2, -y+1, -z$     #11  $x, y, z+1$     #12  $x, -y+1/2, z+1$

#13  $x+1/2, y, -z+1/2$



Figure S3. The coordination of cations for  $\text{Mg}_5(\text{SiO}_4)_2\text{F}_2$  : (a) the  $\text{Mg}_1\text{O}_4\text{F}_2$  octahedron; (b) the  $\text{Mg}_2\text{O}_5\text{F}$  octahedron; (c) the  $\text{Mg}_3\text{O}_6$  octahedron; (d) the  $\text{SiO}_4$  tetrahedron

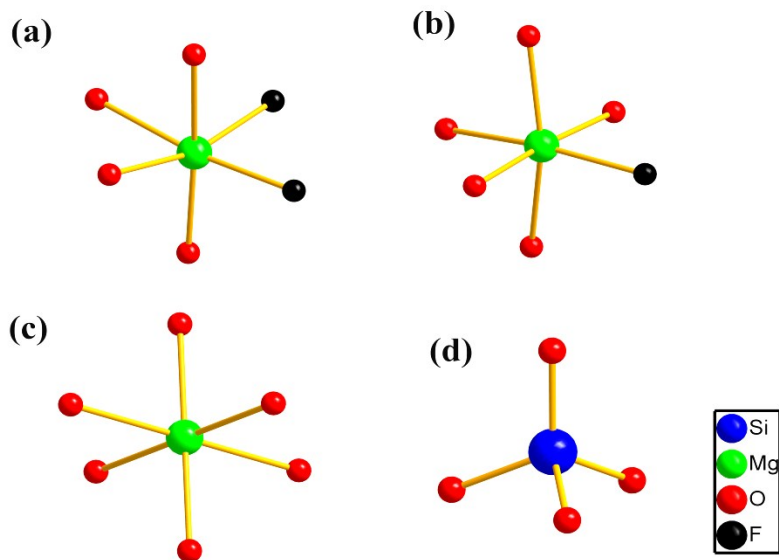

Figure S4. The coordination of cations for  $\text{Mg}_3\text{SiO}_4\text{F}_2$  : (a) the  $\text{Mg1O}_4\text{F}_2$  octahedron; (b) the  $\text{Mg2O}_4\text{F}_2$  octahedron; (c) the  $\text{SiO}_4$  tetrahedron

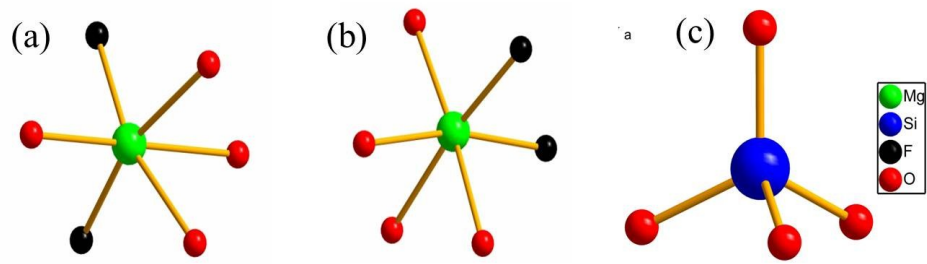

Figure S5. The IR spectrum of  $\text{Mg}_5(\text{SiO}_4)_2\text{F}_2$ .

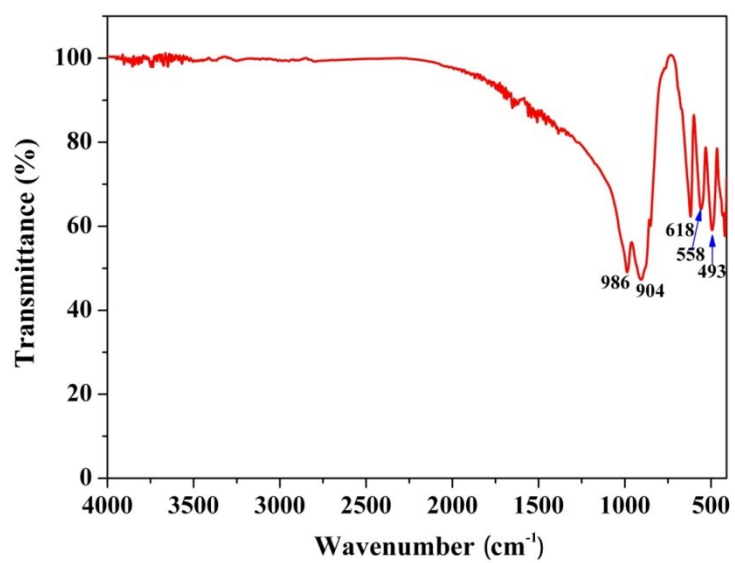

Figure S6. The diffuse reflectance spectrum for  $\text{Mg}_5(\text{SiO}_4)_2\text{F}_2$ .

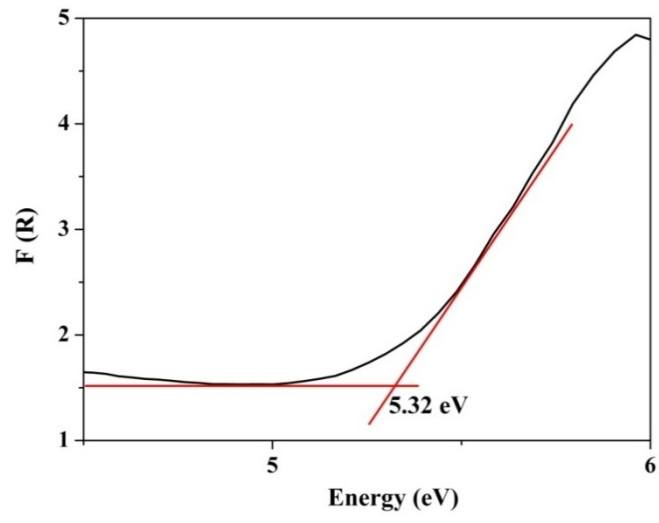

Table S4. (a) The optimized lattice parameters between experimental and theoretical results for  $\text{Mg}_5(\text{SiO}_4)_2\text{F}_2$ .

|                        | $a$ (Å)  | $b$ (Å)    | $c$ (Å)   | Alpha | Beta            | Gamma |
|------------------------|----------|------------|-----------|-------|-----------------|-------|
| Castep<br>Calculation  | 7.907(8) | 4.7862(7)  | 10.382(6) | 90    | 109.041(44)     | 90    |
| Experimental<br>Result | 7.774(2) | 4.6585(11) | 10.254(3) | 90    | 109.516<br>(15) | 90    |

Table S4. (b) The optimized lattice parameters between experimental and theoretical results for  $\text{Mg}_3\text{SiO}_4\text{F}_2$ .

|                        | $a$ (Å)   | $b$ (Å)  | $c$ (Å)  | Alpha | Beta | Gamma |
|------------------------|-----------|----------|----------|-------|------|-------|
| Castep<br>Calculation  | 10.424(8) | 8.862(8) | 4.766(3) | 90    | 90   | 90    |
| Experimental<br>Result | 10.268(7) | 8.694(6) | 4.650(3) | 90    | 90   | 90    |

Table S5. (a) The calculated bond lengths in comparison with experimental data for  $\text{Mg}_5(\text{SiO}_4)_2\text{F}_2$ .

| bond type  | experiment<br>bond length (Å) | calculation bond length(Å) |
|------------|-------------------------------|----------------------------|
| Mg(1)-F(1) | 1.997(4)                      | 2.0260                     |
| Mg(1)-F(1) | 2.016(4)                      | 2.0500                     |
| Mg(1)-O(1) | 2.120(4)                      | 2.1930                     |
| Mg(1)-O(2) | 1.999(4)                      | 2.0240                     |
| Mg(1)-O(2) | 2.096(4)                      | 2.1340                     |
| Mg(1)-O(4) | 2.096(4)                      | 2.1310                     |
| Mg(2)-F(1) | 2.021(4)                      | 2.0640                     |
| Mg(2)-O(1) | 2.036(4)                      | 2.0710                     |
| Mg(2)-O(3) | 2.048(5)                      | 2.0760                     |
| Mg(2)-O(2) | 2.174(4)                      | 2.2150                     |
| Mg(2)-O(4) | 2.175(4)                      | 2.2140                     |
| Mg(2)-O(3) | 2.180(5)                      | 2.2380                     |
| Mg(3)-O(1) | 2.057(4)                      | 2.1080                     |
| Mg(3)-O(3) | 2.089(4)                      | 2.1320                     |
| Mg(3)-O(4) | 2.113(4)                      | 2.1480                     |
| Si(1)-O(4) | 1.565(5)                      | 1.6290                     |
| Si(1)-O(2) | 1.577(5)                      | 1.6540                     |
| Si(1)-O(3) | 1.617(5)                      | 1.6520                     |
| Si(1)-O(1) | 1.693(5)                      | 1.6660                     |

Table S5. (b) The calculated bond lengths in comparison with experimental data for Mg<sub>3</sub>SiO<sub>4</sub>F<sub>2</sub>.

| bond type  | experiment<br>bond length (Å) | calculation bond length(Å) |
|------------|-------------------------------|----------------------------|
| Mg(1)-F(1) | 2.002(3)                      | 2.0410                     |
| Mg(1)-O(1) | 2.032(5)                      | 2.0540                     |
| Mg(1)-O(2) | 2.157(4)                      | 2.2050                     |
| Mg(1)-O(3) | 2.200(5)                      | 2.2390                     |
| Mg(2)-F(1) | 1.985(3)                      | 2.0160                     |
| Mg(2)-O(2) | 1.995(4)                      | 2.0240                     |
| Mg(2)-F(1) | 2.020(3)                      | 2.0560                     |
| Mg(2)-O(2) | 2.093(4)                      | 2.1350                     |
| Mg(2)-O(3) | 2.101(4)                      | 2.1420                     |
| Mg(2)-O(1) | 2.134(4)                      | 2.2000                     |
| Si(1)-O(3) | 1.570(5)                      | 1.6290                     |
| Si(1)-O(2) | 1.619(4)                      | 1.6570                     |
| Si(1)-O(1) | 1.645(6)                      | 1.6520                     |
